# Supplementary material
Source: PubMed Central journal article supplement (PMC3486194)
Supplement: MCB.06267-11_zmb999109742so2.pdf [file MCB.06267-11_zmb999109742so2.pdf]

| Supplemental Table 1 siRNA Sequences |                                    |                    |
|--------------------------------------|------------------------------------|--------------------|
| siRNA name                           | Invitrogen Stealth siRNA sequences | Gene               |
| CYCLIN K siRNA-1                     | ACCAGCCAUAUUGGCUCAUAAAUA           | 3'UTR CYCLIN K     |
| CYCLIN K siRNA-1                     | UAUUUAUUGAGCCAUAUUGGCUGGU          | 3'UTR CYCLIN K     |
| CYCLIN K siRNA-2                     | CCAAUCCAUCUGAAGCCAAGCUGU           | 3'UTR CYCLIN K     |
| CYCLIN K siRNA-2                     | ACAGCUUGGCUUCAGAUGGAAUUGG          | 3'UTR CYCLIN K     |
| CDK9 siRNA                           | GUCAACUUGAUUGAGAUUUGUCGAA          | CDK9 ORF           |
| CDK9 siRNA                           | UUCGACAAAUCUCAUCAAGUUGAC           | CDK9 ORF           |
| CDK9 Negative Control                | GGAUGGACUGAUGUAAUCUUAUCUA          | scramble CDK9 ORF  |
| CDK9 Negative Control                | UAGAUAAAGAUUACAUCAGUCCAUC          | scramble CDK9 ORF  |
| CDK12 siRNA-3                        | CCGAGAAGCAUCUUGUJAAAGAUUU          | CRKRS ORF          |
| CDK12 siRNA-3                        | AAAUCUUUAACAAGAUGCUUCUCGG          | CRKRS ORF          |
| CDK12 siRNA-1                        | CAGAGCGAGGUAAUCAUCUGCAUUU          | 3'UTR CDK12        |
| CDK12 siRNA-1                        | AAAUGCAGAUGAUUACCUCGCUCUG          | 3'UTR CDK12        |
| CDK12 siRNA-2                        | CGAAUAAUGAUGUUGGCACCAGUU           | 3'UTR CDK12        |
| CDK12 siRNA-2                        | AACUGGUGCCAACAUCAUUUUUCG           | 3'UTR CDK12        |
| CDK12 Negative Control               | GCAUGACUAGAUUUCGUUAAACAGU          | scramble CRKRS ORF |
| CDK12 Negative Control               | ACUGUUUAACGAAUCUAGUCAUGC           | scramble CRKRS ORF |

**Supplemental Table S1. Invitrogen STEALTH™ siRNA sequences used to knockdown the expression of CDK9, CDK12 and CYCLIN K.**
