# Supplementary material
Source: PubMed Central journal article supplement (PMC3486194)
Supplement: MCB.06267-11_zmb999109742so3.pdf [file MCB.06267-11_zmb999109742so3.pdf]

| Supplemental Table S2. Multiple Reaction Monitoring Peptides and Transitions |                |                 |                                     |
|------------------------------------------------------------------------------|----------------|-----------------|-------------------------------------|
| Protein                                                                      | parent ion m/z | Q3 fragment m/z | sequence                            |
| CYCLIN K1/K2                                                                 | 674.4          | 644.8           | 30 DLAHTPSQLEGLDPATEAR 48           |
|                                                                              |                | 759.7           |                                     |
|                                                                              |                | 929.8           |                                     |
|                                                                              | 477.9          | 694.4           | 56 FIFDVGTR 63                      |
|                                                                              |                | 432.6           |                                     |
| 547.4                                                                        |                |                 |                                     |
| CYCLIN K1 unique                                                             | 785.8          | 604.2           | 375 KPPLAAALGEAEPPGPVDATDLPK 398    |
|                                                                              |                | 1148.9          |                                     |
|                                                                              |                | 1206.8          |                                     |
|                                                                              | 625.0          | 581.8           | 358 IETTHPPLPPAHPDPDR 374           |
|                                                                              |                | 646.2           |                                     |
| 889.8                                                                        |                |                 |                                     |
| CYCLIN K2 unique                                                             | 709.7          | 744.4           | 319 QPATHLLPSPLEDSLCCPR 337         |
|                                                                              |                | 860.6           |                                     |
|                                                                              |                | 910.9           |                                     |
|                                                                              |                | 928.7           |                                     |
|                                                                              |                | 1102.8          |                                     |
| CYCLIN L1                                                                    | 698.0          | 770.9           | 348 AEEKSPISINVK 359                |
|                                                                              |                | 839.8           |                                     |
|                                                                              |                | 967.9           |                                     |
| CYCLIN T1                                                                    | 476.2          | 504.8           | 27 FGVDPAKELSYR 38                  |
|                                                                              |                | 667.8           |                                     |
|                                                                              |                | 640.4           |                                     |
|                                                                              | 910.8          | 952.0           | 351 TSENALTGVDHSLPQDGSNAFISQK 376   |
|                                                                              |                | 1291.9          |                                     |
|                                                                              |                | 1058.3          |                                     |
|                                                                              | 630.5          | 702.4           | 439 MPIEGSENPERPFLEK 454            |
|                                                                              |                | 766.9           |                                     |
| 871.7                                                                        |                |                 |                                     |
| CYCLIN T2                                                                    | 674.9          | 1008.6          | 80 NISSTALFLAAK 92                  |
|                                                                              |                | 1121.9          |                                     |
|                                                                              |                | 1064.6          |                                     |
| CDK9                                                                         | 512.9          | 471.6           | 295 LLVLDPAQR 303                   |
|                                                                              |                | 586.4           |                                     |
|                                                                              |                | 798.6           |                                     |
|                                                                              | 581.9          | 716.6           | 285 DPYALDLIDK 294                  |
|                                                                              |                | 787.8           |                                     |
|                                                                              | 591.9          | 950.9           | 25 IGQGTGGEVFK 35                   |
| 884.5                                                                        |                |                 |                                     |
| CDK11                                                                        | 680.5          | 1060.8          | 648 IWPGYSELPAVK 659                |
|                                                                              |                | 963.8           |                                     |
|                                                                              |                | 531.1           |                                     |
|                                                                              | 510.4          | 686.5           | 462 EGFPIITSLR 472                  |
|                                                                              |                | 589.6           |                                     |
|                                                                              |                | 476.5           |                                     |
|                                                                              | 643.6          | 1043.6          | 431 IEEGTGVVYR 441                  |
|                                                                              |                | 914.8           |                                     |
| 756.7                                                                        |                |                 |                                     |
| CDK12                                                                        | 676.9          | 783.8           | 1052 QSGVVVEEPPPSK 1064             |
|                                                                              |                | 882.7           |                                     |
|                                                                              |                | 981.8           |                                     |
|                                                                              | 455.8          | 494.6           | 611 TQVSVTAAIPHLK 623               |
|                                                                              |                | 607.8           |                                     |
|                                                                              |                | 678.8           |                                     |
|                                                                              | 794.4          | 855.8           | 381 HSSISPVRLPLNSSLGAELSR 401       |
|                                                                              |                | 981.5           |                                     |
| 889.9                                                                        |                |                 |                                     |
| CDC2L5 (CDK13)                                                               | 734.9          | 1153.9          | 1056 TNTPQGVLPSSQLK 1069            |
|                                                                              |                | 772.6           |                                     |
|                                                                              |                | 659.3           |                                     |
|                                                                              | 795.8          | 1121.1          | 1110 VETDAAQAAVQ SAFAVLLTQL IK 1132 |
|                                                                              |                | 1064.6          |                                     |
|                                                                              | 628.7          | 837             | 1240 AALLQLLAHQHPQDDPK 1256         |
| 759.7                                                                        |                |                 |                                     |
| 815.9                                                                        |                |                 |                                     |
|                                                                              |                | 695.4           |                                     |

**Supplemental Table S2. Multiple Reaction Monitoring (MRM) peptides and transitions used for the detection of CDK and CYCLIN proteins.**
