# Supplementary material
Source: PubMed Central journal article supplement (PMC3486194)
Supplement: MCB.06267-11_zmb999109742so5.pdf [file MCB.06267-11_zmb999109742so5.pdf]

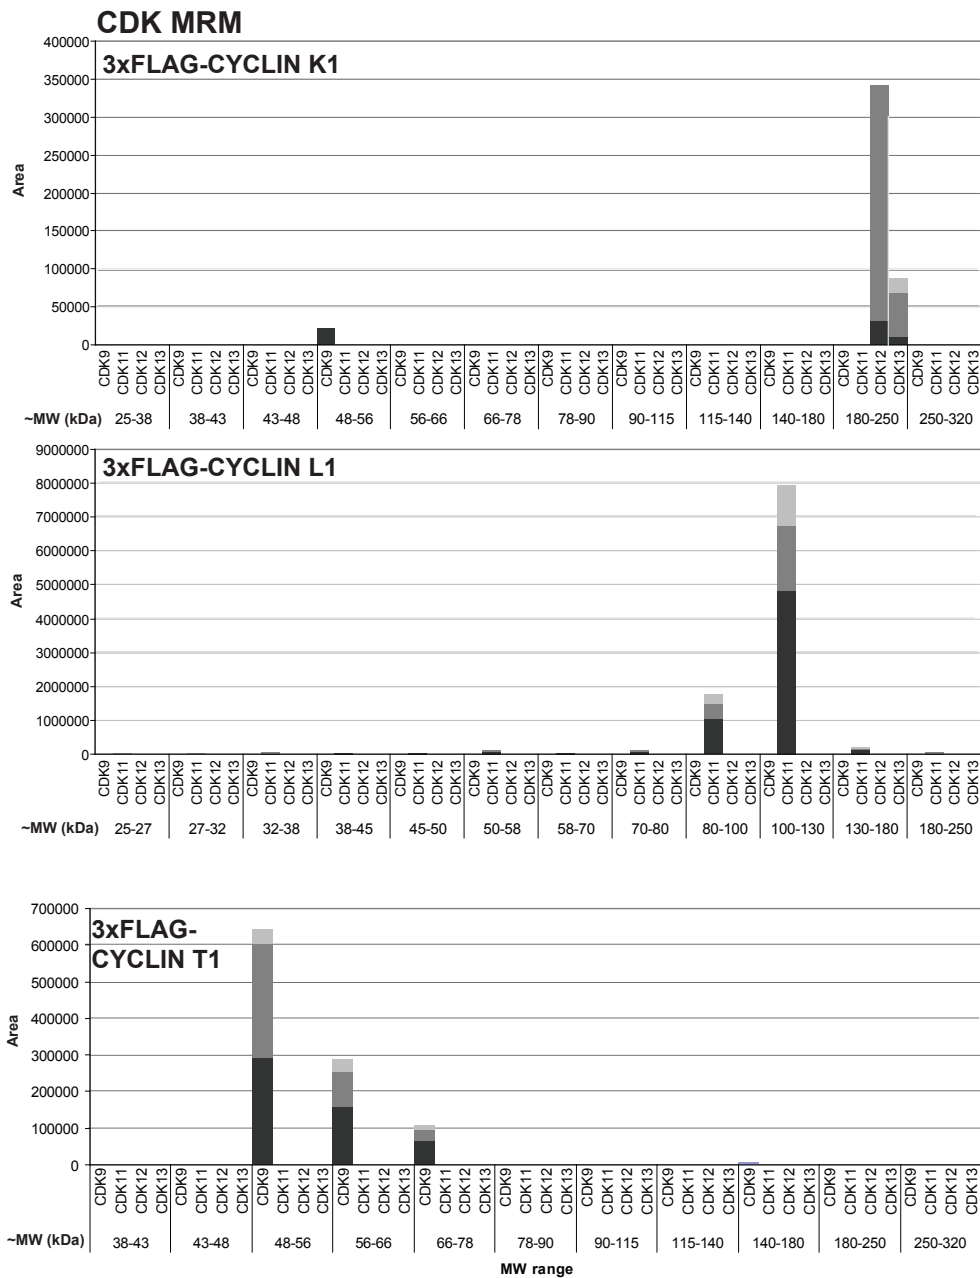

**Supplemental Fig. S2. Multiple Reaction Monitoring (MRM) analysis of CYCLIN immunoprecipitated complexes.**

3xFLAG-CYCLIN K1, L1 and T1 complexes were immunoprecipitated from HEK293A cells and proteins were analyzed by MRM as described in Supplemental Methods. A CDK MRMs of 3xFLAG-CYCLIN K1, 3xFLAG-CYCLIN L1 and 3xFLAG-CYCLIN T1 protein complexes showed that CYCLIN K1 interacted predominantly with CDK12 and CDK13 and minimally with CDK9, while CYCLIN L1 interacted only with CDK11, and CYCLIN T1 interacted only with CDK9.
