# Supplementary material
Source: PubMed Central journal article supplement (PMC3486194)
Supplement: MCB.06267-11_zmb999109742so6.pdf [file MCB.06267-11_zmb999109742so6.pdf]

A

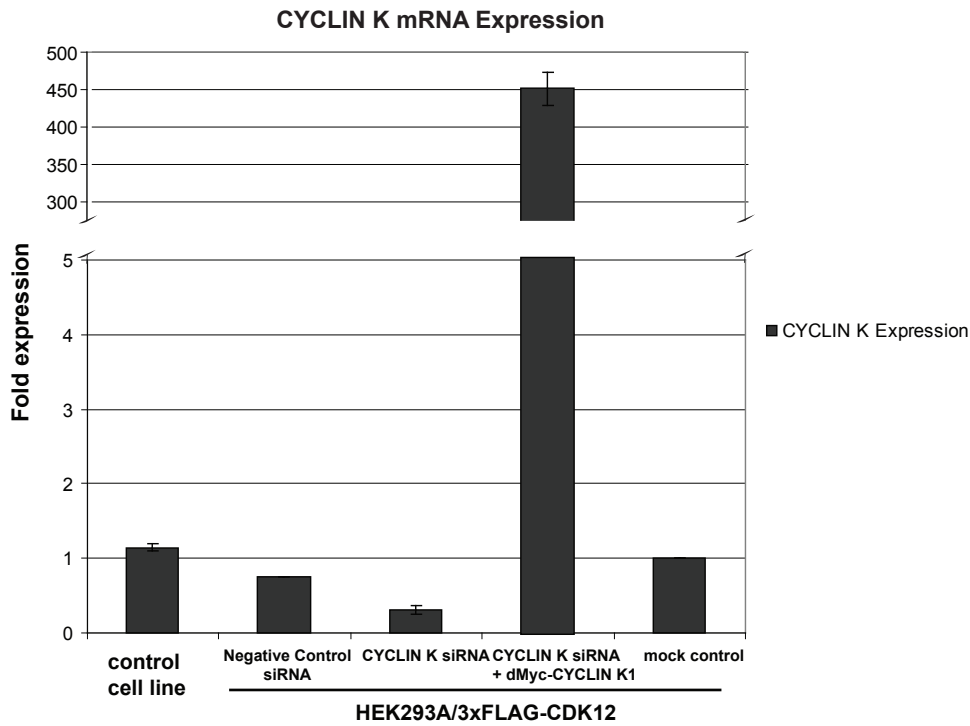

B

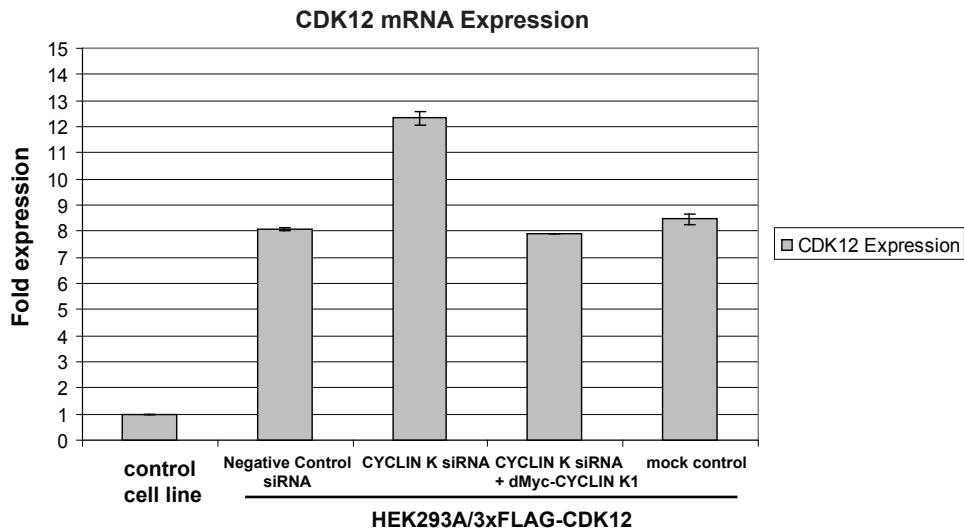

**Supplemental Fig. S3. Quantitative RT-PCR analysis of CDK12 and CYCLIN K mRNA**

**expression in siRNA treated cells.** Quantitative RT-PCR was performed as described in

Supplemental Methods. **A.** CYCLIN K mRNA expression was reduced between 60-70% by the

CYCLIN K 3' UTR siRNA in HEK293A cells stably expressing 3xFLAG-CDK12 when

normalized against a mock transfected control. **B.** CDK12 mRNA expression in the 3xFLAG-

CDK12 stable cell line was typically 8-12 fold higher than the control cell line. Vertical error

bars denotes the standard deviation in 3 replicates.
